# Supplementary material for: MiR-92a promotes stem cell-like properties by activating Wnt/β-catenin signaling in colorectal cancer
Source: PubMed Central journal article supplement (PMC5731912; doi:10.18632/oncotarget.21667), 2017-10-09
Supplement: oncotarget-08-101760-s001.pdf [file oncotarget-08-101760-s001.pdf]

# MiR-92a promotes stem cell-like properties by activating Wnt/ $\beta$ -catenin signaling in colorectal cancer

## SUPPLEMENTARY MATERIALS

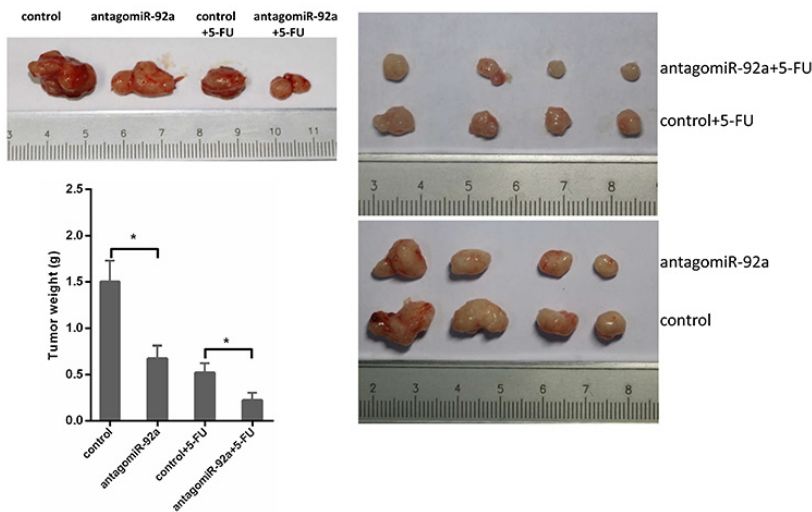

Supplementary Figure 1: Subcutaneous tumor model was used to assess the effect of antagomiR-92a on the chemoresistance of HCT116 cells *in vivo*.

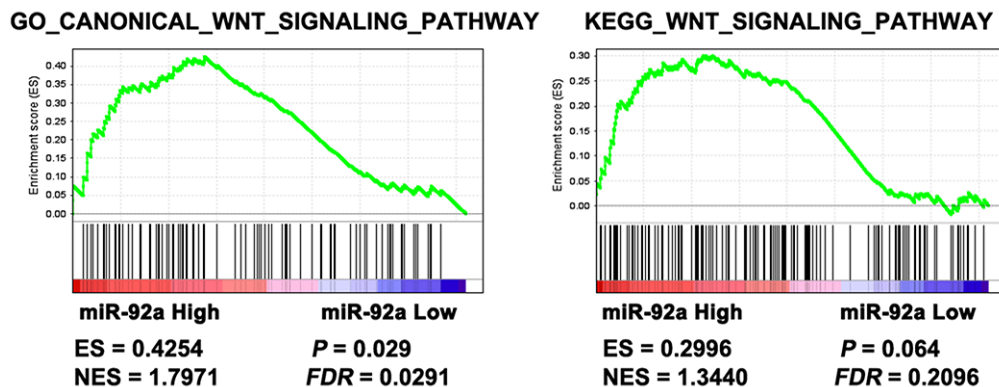

Supplementary Figure 2: GSEA plot showing that miR-92a expression was positively correlated with Wnt-activated gene signatures.

**Supplementary Table 1: Primer sequences used for PCR amplification**

| <b>Primers for real-time quantitative RT-PCR</b>                           |                                                                                 |                                                               |
|----------------------------------------------------------------------------|---------------------------------------------------------------------------------|---------------------------------------------------------------|
| KLF4                                                                       | 5'-CGAACCCACACAGGTGAGAA-3'                                                      | 5'-TACGGTAGTGCCTGGTCAGTTC-3'                                  |
| DKK3                                                                       | 5'-TCACATCTGTGGGAGACGAA-3'                                                      | 5'-CAGGTGTACTGGAAGCTGGC-3'                                    |
| CD44                                                                       | 5'-GACAAGTTTTGGTGGCACG-3'                                                       | 5'-CACGTGGAATACACCTGCAA-3'                                    |
| MYC                                                                        | 5'-CACCGAGTCGTAGTCGAGGT-3'                                                      | 5'-GCTGCTTAGACGCTGGATTT-3'                                    |
| GSK3 $\beta$                                                               | 5'-CCACTGTTGTCACCTTGCTG-3'                                                      | 5'-GAGTGATCATGTCAGGGCG-3'                                     |
| CCND1                                                                      | 5'-AGAGGCGGAGGAGAACAAC-3'                                                       | 5'-GGCGGATTGGAATGAACTT-3'                                     |
| MMP7                                                                       | 5'-GCATCTCCTTGAGTTTGGCT-3'                                                      | 5'-GAGCTACAGTGGGAACAGGC-3'                                    |
| GAPDH                                                                      | 5'-GACTCATGACCACAGTCCATGC-3'                                                    | 5'-AGAGGCAGGGATGATGTTCTG-3'                                   |
| <b>Primer Sequences used for PCR amplification of plasmid construction</b> |                                                                                 |                                                               |
| STAT3                                                                      | 5'-GCTAAGCTTTATGGCCCAATGGAATCA<br>GCTACAG-3'(HindIII)                           | 5'-GCTCTCGAGTCATGGGGGAGGTAGCG<br>CACTCCG-3'(XhoI)             |
| <b>Primers for luciferase plasmids construction</b>                        |                                                                                 |                                                               |
| miR-92a-pGL3                                                               | 5'-CACAACTCGAGAGGAAGTATGAGCGA<br>AACCCT-3' (XhoI)                               | 5'-CAAAAGCTTCGCTTTACTACGACCGG<br>AGG-3' (HindIII)             |
| <b>Primers for gene 3'UTR luciferase plasmid construction</b>              |                                                                                 |                                                               |
| KLF4 wt                                                                    | 5'-CACAACTCGAGCCCAGCCAGAAAGCA<br>CTACA-3' (XhoI)                                | 5'-AAGGAAAAAAGCGGCCGCTCTGCTTA<br>AGGCATACTTGGGA-3' (NotI)     |
| KLF4 mut                                                                   | 5'-TGCATTTCCCTACTTGGTCTGGCTTTAA<br>GAATGTCCTTTGG-3' (XhoI)                      | 5'-AAGTTCCCTTTTGCAATAGTAATCCAA<br>ACCAAAAAGCTCTGAGC-3' (NotI) |
| DKK3 wt                                                                    | 5'-CACAACTCGAGATCTGGACCAGGCTGT<br>GGG-3' (XhoI)                                 | 5'-CACAAACAAGCGGCCGCGATGTTTG<br>CAAAGCAGGGCA-3' (NotI)        |
| DKK3 mut                                                                   | 5'-CACAACTCGAGATCTGGACCAGGCTGT<br>CCCTAGATCACGTTAAGAAATAGCTAATT<br>TA-3' (XhoI) | 5'-CACAAACAAGCGGCCGCGATGTTTG<br>CAAAGCAGGGCA-3' (NotI)        |
| GSK3 $\beta$ wt                                                            | 5'-CACAACTCGAGAACAGCAGATTCTGG<br>GAGCC-3' (XhoI)                                | 5'-CACAAACAAGCGGCCGCGATGATCC<br>ATCGGCAACACA-3' (NotI)        |
| GSK3 $\beta$ mut                                                           | 5'-GCTATTACGTTATACTAGCAGTTACTG<br>CACGGAG-3' (XhoI)                             | 5'-CTAGTATAACGTGAATAGCATTTTAGA<br>CCTACTGAC-3' (NotI)         |
| <b>Primers for ChIP assay promoter-specific PCR</b>                        |                                                                                 |                                                               |
| miR-92a                                                                    | 5'-TGTACAATCACGAACCAGTGA-3'                                                     | 5'-AGCATAGCTCGGAAAGAACCTC-3'                                  |
